# Supplementary material
Source: PubMed Central journal article supplement (PMC4511195)
Supplement: supp_fj.14-266064_Supplemental_Figure.pdf [file supp_fj.14-266064_Supplemental_Figure.pdf]

**S1**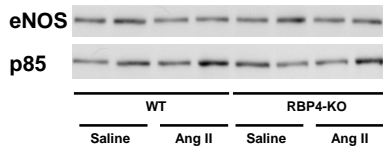**S2**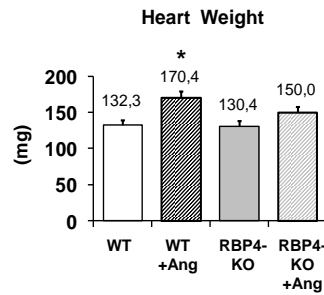**S3**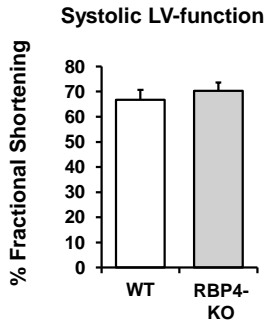**S4**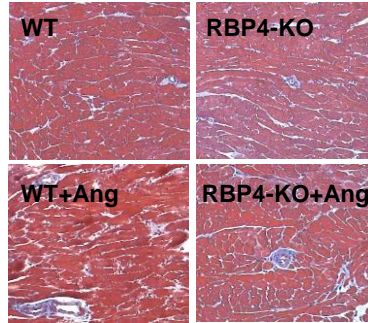**S5**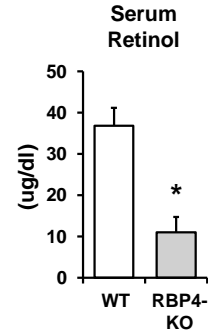

### Supplementary Figures

**S1** Total eNOS-protein expression was not different in AngII-treated WT and RBP4-KO.

**S2** Heart weight was not different between WT and RBP4-KO mice at 18 weeks of age, but increased only with AngII-treatment in WT and not significantly in RBP4-KO.

\* <0.05 vs. WT and RBP4-KO, p=0.13 for WT+Ang vs. KO+Ang.

**S3** Echocardiography showed normal systolic function in WT and RBP4-KO mice. FS = Fractional shortening. 12 week old male mice, n = 9 per group.

**S4** HE-stains of myocardium of WT and RBP4-KO. AngII-treatment increased cell diameter significantly in WT, but not in RBP4-KO mice. No statistically significant difference between WT+Ang and KO+Ang.

**S5** Serum retinol levels were lower in RBP4-KO compared to WT mice. 5 month old male mice, n=7 per group, \* <0.05.
