# Supplementary material
Source: PubMed Central journal article supplement (PMC4511195)
Supplement: supp_fj.14-266064_Supplemental_Table.pdf [file supp_fj.14-266064_Supplemental_Table.pdf]

| Genotype and Treatment Group | Age [weeks] | Systolic |             | Diastolic |             | Mean   |             | Heart Rate |      |
|------------------------------|-------------|----------|-------------|-----------|-------------|--------|-------------|------------|------|
|                              |             | [mmHg]   | SEM         | [mmHg]    | SEM         | [mmHg] | SEM         | [bpm]      | SEM  |
| WT                           | 6           | 102      | ± 2.6       | 73        | ± 2.2       | 82     | ± 2.2       | 704        | ± 12 |
| RBP4-KO                      | 6           | 86       | ± 3.5 *     | 62        | ± 4.4 *     | 71     | ± 4.5 *     | 718        | ± 23 |
| WT                           | 12-14       | 101      | ± 3.5       | 76        | ± 2.7       | 84     | ± 3.0       | 732        | ± 9  |
| RBP4-Tg                      | 12-14       | 110      | ± 2.1 *     | 85        | ± 2.0 *     | 93     | ± 1.9 *     | 718        | ± 9  |
| WT                           | 12-14       | 107      | ± 4.7       | 75        | ± 4.0       | 86     | ± 4.2       | 692        | ± 51 |
| WT-Ang                       | 12-14       | 145      | ± 3.7 * † § | 99        | ± 5.0 * †   | 114    | ± 4.5 * † § | 713        | ± 77 |
| RBP4-KO                      | 12-14       | 93       | ± 1.4 * ‡ § | 64        | ± 2.5 * ‡ § | 73     | ± 1.9 * ‡ § | 751        | ± 17 |
| RBP4-KO-Ang                  | 12-14       | 124      | ± 4.9 * † ‡ | 88        | ± 4.9 * †   | 100    | ± 4.7 * † ‡ | 767        | ± 39 |
| WT-Chow                      | 18          | 111      | ± 2.8       | 83        | ± 2.5       | 92     | ± 2.5       | 635        | ± 28 |
| WT-HFD                       | 18          | 119      | ± 4.2 * †   | 89        | ± 5.1 †     | 99     | ± 4.8 †     | 635        | ± 24 |
| RBP4-KO-Chow                 | 18          | 99       | ± 3.9 * ‡ § | 70        | ± 2.8 * ‡ § | 79     | ± 3.1 * ‡ § | 657        | ± 18 |
| RBP4-KO-HFD                  | 18          | 110      | ± 3.4 †     | 82        | ± 3.5 †     | 92     | ± 3.5 †     | 673        | ± 28 |

### Supplementary Table

#### Tabular results of blood pressure measurements including heart rate data.

Systolic, diastolic and mean blood pressure and heart rate were measured at different ages and with different treatments in WT, RBP4-KO and RBP4-Tg mice.

\* <0.05 vs. WT-untreated with Ang or HFD

† <0.05 vs. KO-untreated with Ang or HFD

‡ <0.05 vs. WT-treated

§ <0.05 vs. KO-treated
